# Supplementary material
Source: publisher figshare collection journal article supplement (https://asha.figshare.com/articles/dataset/_/23706354)
Supplement: Supplementary file 1 [file 1]

**Supplemental Material S2.** Post-hoc comparisons across the five PROMS subtest score.

| <b>Bonferroni-adjusted statistics</b> |                 |                  |                                                                                |
|---------------------------------------|-----------------|------------------|--------------------------------------------------------------------------------|
| <b>Subtest condition</b>              | <b><i>t</i></b> | <b><i>df</i></b> | <b><i>p</i>-value two-tailed<br/>(based on <math>\alpha/10 = 0.005</math>)</b> |
| Pitch vs. Melody                      | 6.824           | 59               | < .001***                                                                      |
| Pitch vs. Tuning                      | 1.937           | 59               | .058                                                                           |
| Pitch vs. Accent                      | -0.180          | 59               | .858                                                                           |
| Pitch vs. Tempo                       | -1.323          | 59               | .191                                                                           |
| Melody vs. Tuning                     | -5.258          | 59               | < .001***                                                                      |
| Melody vs. Accent                     | -7.823          | 59               | < .001***                                                                      |
| Melody vs. Tempo                      | -7.906          | 59               | < .001***                                                                      |
| Tuning vs. Accent                     | -2.070          | 59               | .043                                                                           |
| Tuning vs. Tempo                      | -2.952          | 59               | .005*                                                                          |
| Accent vs. Tempo                      | -1.257          | 59               | .214                                                                           |
