# Supplementary material
Source: publisher figshare collection journal article supplement (https://asha.figshare.com/articles/dataset/_/23706354)
Supplement: Supplementary file 2 [file 1]

**Supplemental Material S3.** Post-hoc comparisons on the interaction between musicianship and PROMS subtest.

| Bonferroni-adjusted statistics |              |          |           |                                                             |
|--------------------------------|--------------|----------|-----------|-------------------------------------------------------------|
| Musicianship                   | Subtest type | <i>t</i> | <i>df</i> | <i>p</i> -value two-tailed<br>(based on $\alpha/5 = 0.01$ ) |
| Musicians vs. Non-musicians    | Pitch        | 3.212    | 58        | .002**                                                      |
|                                | Melody       | 7.430    | 58        | < .001***                                                   |
|                                | Tuning       | 5.243    | 58        | < .001***                                                   |
|                                | Accent       | 3.671    | 58        | .001**                                                      |
|                                | Tempo        | 2.543    | 58        | .014                                                        |
