# Supplementary material
Source: publisher figshare collection journal article supplement (https://asha.figshare.com/articles/dataset/_/23706354)

**Supplemental Material S1.** Pilot speech intelligibility results for identifying original, flat-intonation, flat-tone and flat-all  $f_0$  Mandarin sentences in the no-noise condition. Data is averaged across 6 subjects (3 musicians and 3 non-musicians). Error bars represent  $\pm 1$  *SD*. n.s. = not significant.

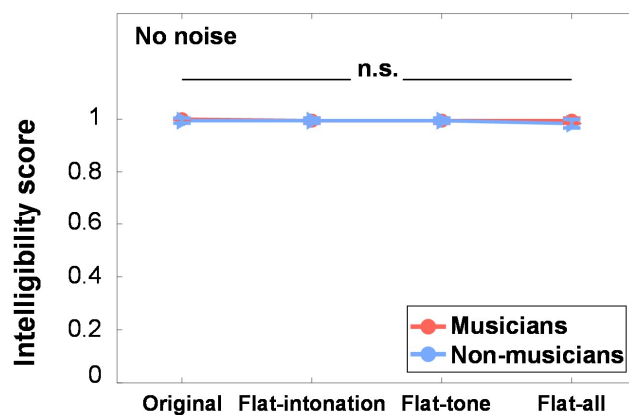

Supplement: Supplementary file 3 [file 1]
