# Supplementary material
Source: publisher figshare collection journal article supplement (https://asha.figshare.com/articles/dataset/_/23706354)
Supplement: Supplementary file 4 [file 1]

**Supplemental Material S5.** Post-hoc comparisons between different SNR levels on speech intelligibility.

| <b>Bonferroni-adjusted statistics</b> |                 |                  |                                                                                |
|---------------------------------------|-----------------|------------------|--------------------------------------------------------------------------------|
| <b>Condition</b>                      | <b><i>t</i></b> | <b><i>df</i></b> | <b><i>p</i>-value two-tailed<br/>(based on <math>\alpha/3 = 0.0167</math>)</b> |
| SNR = -9 vs. -5                       | -56.467         | 59               | < .001***                                                                      |
| SNR = -9 vs. 0                        | -51.998         | 59               | < .001***                                                                      |
| SNR = -5 vs. 0                        | -19.543         | 59               | < .001***                                                                      |
