# Supplementary material
Source: publisher figshare collection journal article supplement (https://asha.figshare.com/articles/dataset/_/23706354)
Supplement: Supplementary file 5 [file 1]

**Supplemental Material S4.** Post-hoc comparisons on performance accuracy with four different levels of degraded- $f_0$  speech conditions.

| <b>Bonferroni-adjusted statistics</b> |                 |                  |                                                                                |
|---------------------------------------|-----------------|------------------|--------------------------------------------------------------------------------|
| <b>Condition</b>                      | <b><i>t</i></b> | <b><i>df</i></b> | <b><i>p</i>-value two-tailed<br/>(based on <math>\alpha/6 = 0.0083</math>)</b> |
| Original vs. Flat-intonation          | 12.998          | 59               | < .001***                                                                      |
| Original vs. Flat-tone                | 12.534          | 59               | < .001***                                                                      |
| Original vs. Flat-all                 | 19.053          | 59               | < .001***                                                                      |
| Flat-intonation vs. Flat-tone         | -0.276          | 59               | .783                                                                           |
| Flat-intonation vs. Flat-all          | 7.061           | 59               | < .001***                                                                      |
| Flat-tone vs. Flat-all                | 7.109           | 59               | < .001***                                                                      |
