# Supplementary material
Source: publisher figshare collection journal article supplement (https://asha.figshare.com/articles/dataset/_/23706354)
Supplement: Supplementary file 6 [file 1]

**Supplemental Material S6.** Post-hoc comparisons on the interaction between  $f_0$ -contour type and SNR.

| Bonferroni-adjusted statistics |                               |        |      |                                                          |
|--------------------------------|-------------------------------|--------|------|----------------------------------------------------------|
| SNR                            | $f_0$ -contour type           | $t$    | $df$ | $p$ -value two-tailed<br>(based on $\alpha/6 = 0.0083$ ) |
| SNR = 0                        | Original vs. Flat-intonation  | 9.409  | 59   | < .001***                                                |
|                                | Original vs. Flat-tone        | 8.010  | 59   | < .001***                                                |
|                                | Original vs. Flat-all         | 10.311 | 59   | < .001***                                                |
|                                | Flat-intonation vs. Flat-tone | -0.514 | 59   | .609                                                     |
|                                | Flat-intonation vs. Flat-all  | 4.270  | 59   | < .001***                                                |
|                                | Flat-tone vs. Flat-all        | 4.704  | 59   | < .001***                                                |
| SNR = -5                       | Original vs. Flat-intonation  | 9.941  | 59   | < .001***                                                |
|                                | Original vs. Flat-tone        | 11.811 | 59   | < .001***                                                |
|                                | Original vs. Flat-all         | 17.083 | 59   | < .001***                                                |
|                                | Flat-intonation vs. Flat-tone | 0.943  | 59   | .349                                                     |
|                                | Flat-intonation vs. Flat-all  | 5.752  | 59   | < .001***                                                |
|                                | Flat-tone vs. Flat-all        | 4.233  | 59   | < .001***                                                |
| SNR = -9                       | Original vs. Flat-intonation  | 6.105  | 59   | < .001***                                                |
|                                | Original vs. Flat-tone        | 4.746  | 59   | < .001***                                                |
|                                | Original vs. Flat-all         | 7.039  | 59   | < .001***                                                |
|                                | Flat-intonation vs. Flat-tone | -1.597 | 59   | .116                                                     |
|                                | Flat-intonation vs. Flat-all  | 1.677  | 59   | .099                                                     |
|                                | Flat-tone vs. Flat-all        | 3.245  | 59   | .002**                                                   |
